# Supplementary material
Source: PubMed Central journal article supplement (PMC7593876)
Supplement: jamacardiol-e204909-s001.pdf [file jamacardiol-e204909-s001.pdf]

## Supplementary Online Content

Kilic A, Mathier MA, Hickey GW. Evolving trends in adult heart transplant with the 2018 heart allocation policy change. *JAMA Cardiol*. Published online October 28, 2020.  
doi:10.1001/jamacardio.2020.4909

**eTable.** Comparison of Postoperative Complications and Length of Hospital Stay Following Heart Transplantation Before Versus After the Policy Change

**This supplementary material has been provided by the authors to give readers additional information about their work.**

**eTable.** Comparison of Postoperative Complications and Length of Hospital Stay Following Heart Transplantation Before Versus After the Policy Change

| <b>Postoperative Outcome</b>   | <b>Before Policy Change<br/>(n=6,078)</b> | <b>After Policy Change<br/>(n=2,801)</b> | <b>P Value</b> |
|--------------------------------|-------------------------------------------|------------------------------------------|----------------|
| New-Onset Dialysis             | 703 (11.6%)                               | 356 (14.3%)                              | 0.001          |
| Stroke                         | 171 (2.8%)                                | 96 (3.9%)                                | 0.01           |
| Pacemaker Implantation         | 144 (2.4%)                                | 58 (2.3%)                                | 0.89           |
| Acute Drug-Treated Rejection   | 735 (12.1%)                               | 285 (11.5%)                              | 0.40           |
| Length of Hospital Stay (days) | 21.2 ± 21.9                               | 21.4 ± 20.5                              | 0.72           |
